# Supplementary material for: Application of Encapsulated Quorum Quenching Strain Acinetobacter pittii HITSZ001 to a Membrane Bioreactor for Biofouling Control
Source: MDPI journal article supplement (doi:10.3390/separations10020127), 2023-02-13
Supplement: s1 [file s1]

## **Supplementary Material**

# **Application of encapsulated quorum quenching strain *Acinetobacter pittii* HITSZ001 in membrane bioreactor for biofouling control**

Yongmei Wang <sup>1,2</sup>, Xiaochi Feng <sup>1,\*</sup>, Wenqian Wang <sup>1</sup>, Hongtao Shi <sup>1</sup>, Zijie Xiao <sup>1</sup>, Chenyi Jiang <sup>1</sup>, Yujie Xu <sup>1</sup>, Xin Zhang <sup>1</sup> and Nanqi Ren <sup>1</sup>

<sup>1</sup> State Key Laboratory of Urban Water Resource and Environment, School of Civil and Environmental Engineering, Harbin Institute of Technology (Shenzhen), Shenzhen, Guangdong, 518055, PR China

<sup>2</sup> Division of Soil and Water Management, Department of Earth and Environmental Sciences, Faculty of Bioscience Engineering, KU Leuven, Kasteelpark Arenberg 20, 3001, Leuven, Belgium

***\*Corresponding authors:***

*Xiao-Chi Feng,*

*Harbin Institute of Technology (Shenzhen)*

*Email: fengxiaochi@hit.edu.cn*

**Text S1. The pictures of membranes**

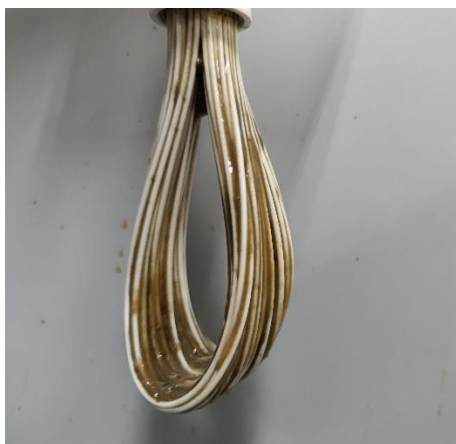

**Figure S1.** Membrane in no beads group

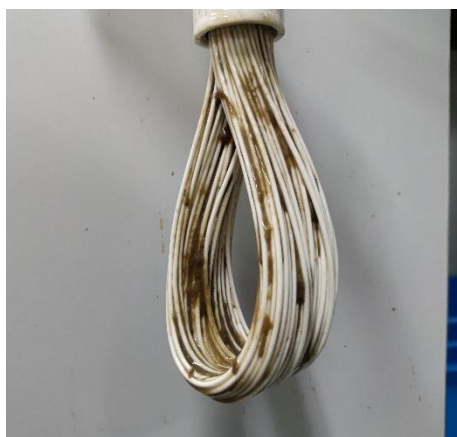

**Figure S2.** Membrane in vacant beads group

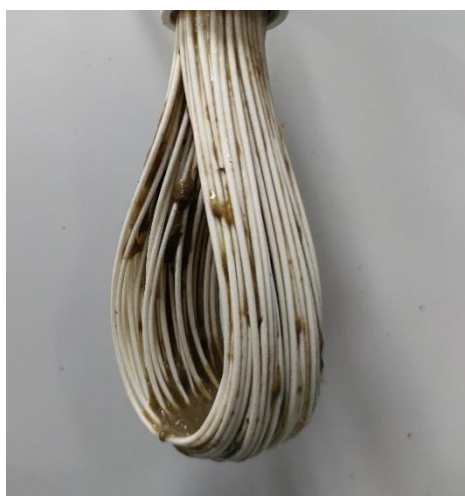

**Figure S3.** Membrane in QQ beads group
